# Supplementary material for: CO2 capture by Mn(i) and Re(i) complexes with a deprotonated triethanolamine ligand
Source: PubMed Central journal article supplement — Chem Sci. 2019 Jan 17;10(10):3080–8. doi: 10.1039/c8sc04389b (PMC6429607; doi:10.1039/c8sc04389b), 2019-01-17

### Supporting information

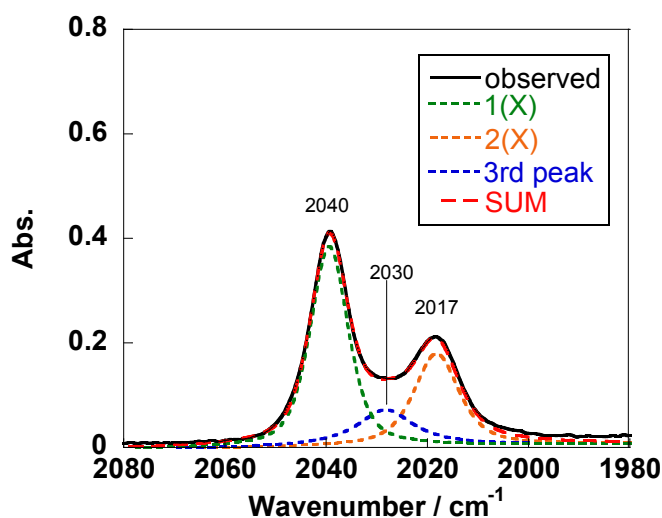

**Figure S1.** IR spectrum of *fac*-[Mn<sup>I</sup>(bpy)(CO)<sub>3</sub>(MeCN)]<sup>+</sup> measured in a DMF solution containing 3.9 M TEOA (black line) and each peaks of 1(H) (green broken line) and 2(H) (orange broken line) and 3<sup>rd</sup> component (blue broken line) obtained by curve fitting for observed spectra. Summation of these peak is shown as a red broken line.

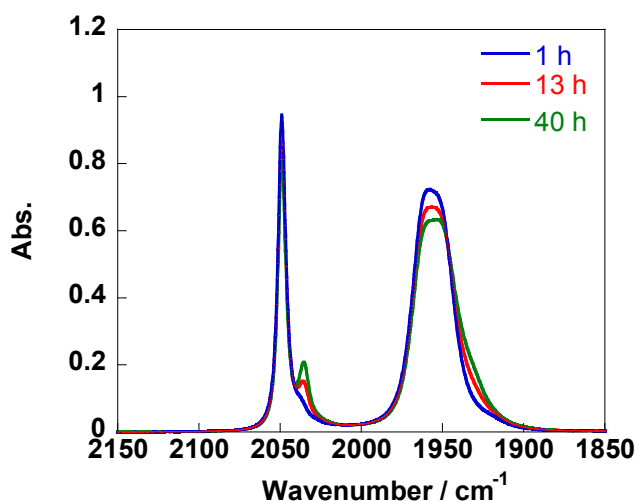

**Figure S2.** IR spectrum of *fac*-[Mn<sup>I</sup>(bpy)(CO)<sub>3</sub>(MeCN)]<sup>+</sup> measured in a MeCN-TEOA mixed solution after several hours from solvating (a) or a DMF-MeCN-TEOA mixed solution after 2h from solvating (b).

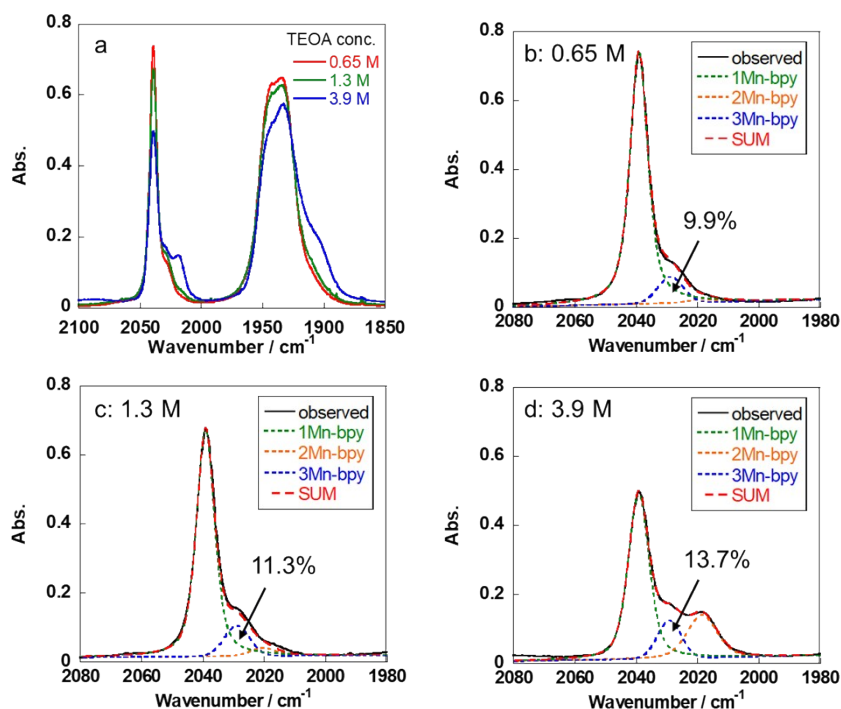

**Figure S3.** IR spectrum of  $fac\text{-}[\text{Mn}^{\text{I}}(\text{bpy})(\text{CO})_3(\text{MeCN})]^+$  measured in a DMF containing several concentrations of TEOA.  $fac\text{-}[\text{Mn}^{\text{I}}(\text{bpy})(\text{CO})_3(\text{MeCN})]^+$  was dissolved into a DMF solution containing 1.3 M of TEOA. After the solution was kept for 60 min, additional TEOA or DMF was added into the solution, i.e., the concentration of TEOA in the solution changed from 1.3 M to 3.9 M or 0.65 M, respectively.

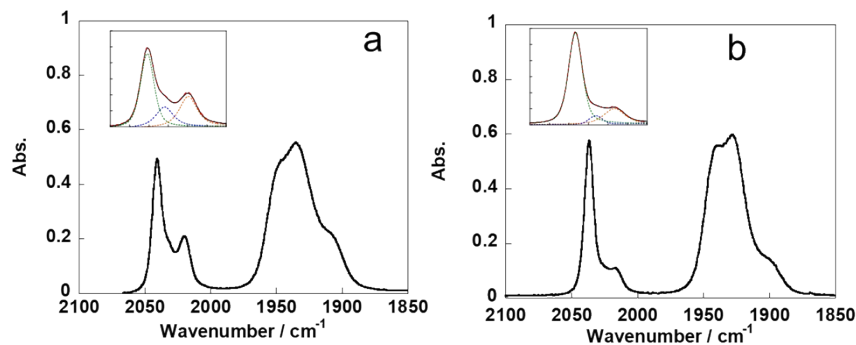

**Figure S4.** IR spectra of  $fac\text{-}[\text{Mn}^{\text{I}}(\text{X}_2\text{bpy})(\text{CO})_3(\text{MeCN})]^+$  ( $\text{X} = \text{Br}$  (a) or  $\text{OMe}$  (b)) in a DMF solution containing 3.8 M under Ar and curve fitting results (inset).

**Table S1.**  $K_1'$  of the Mn(I) and Re(I) complexes.

| Metal  | Mn(I)           |                |                 | Re(I) |              |                |     |
|--------|-----------------|----------------|-----------------|-------|--------------|----------------|-----|
|        | X               | H              | Br              | OMe   | H            | Br             | OMe |
| $K_1'$ | 0.66<br>(±0.06) | 1.3<br>(±0.02) | 0.46<br>(±0.01) | 19    | 117<br>(±11) | 27.3<br>(±2.2) |     |

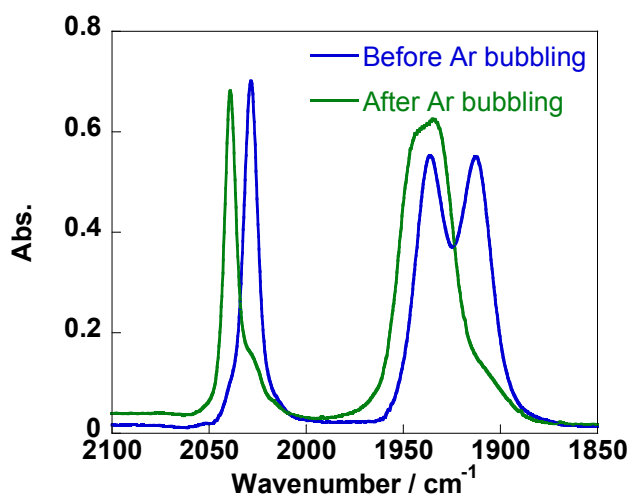

**Figure S5.** IR spectra of  $fac-[Mn^I(bpy)(CO)_3(MeCN)]^+$  in a  $CO_2$  saturated DMF-TEOA measured before (blue line) and after Ar bubbling (green line).

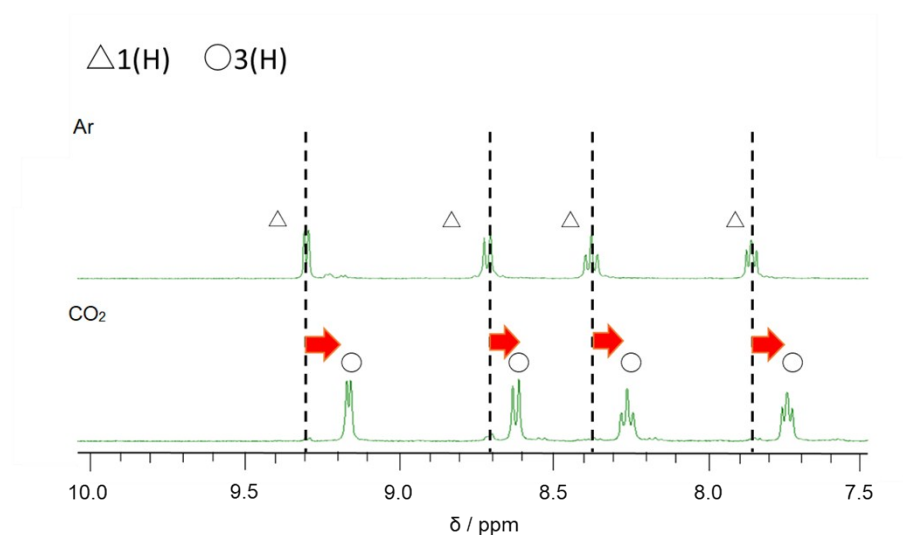

**Figure S6.** <sup>1</sup>H NMR spectra of  $fac-[Mn^I(bpy)(CO)_3(MeCN)]^+$  in  $DMSO-d_6$  containing 1.3 M TEOA under Ar (a) and  $CO_2$  (b).  $\Delta 1Mn-bpy$ ,  $\circ 4Mn-bpy$ .

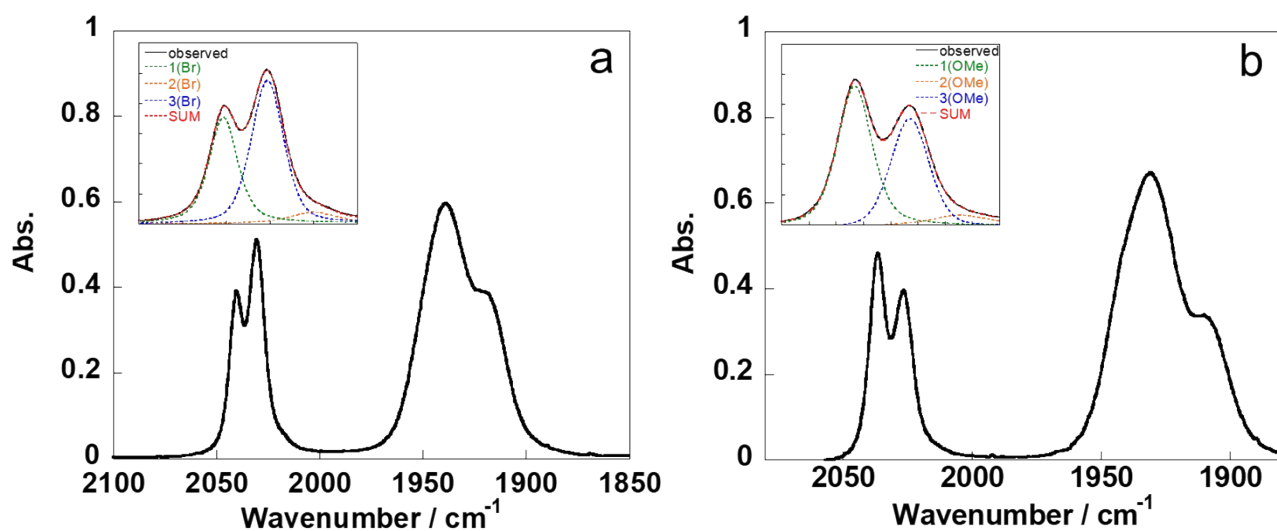

**Figure S7.** IR spectra of *fac*-[Mn<sup>I</sup>(X<sub>2</sub>bpy)(CO)<sub>3</sub>(MeCN)]<sup>+</sup> (X = Br (a) or OMe (b)) in a DMF-TEOA mixed solution containing 3.17 mM CO<sub>2</sub>.

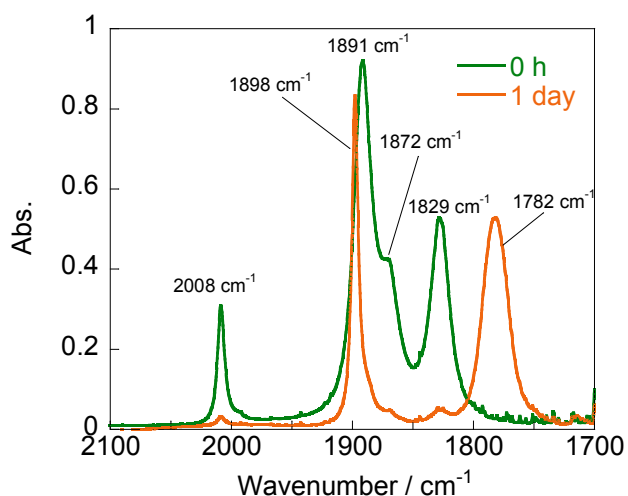

**Figure S8.** IR spectra of 4.9 mM [W(bpy)(CO)<sub>4</sub>] in an acetonitrile solution before and after reflux for one day.  $\nu_{\text{CO}}$  at 2008, 1891, 1872 and 1829 cm<sup>-1</sup> were of original species. After reflux, these peaks were almost completely disappeared and new bands at 1898 and 1782 cm<sup>-1</sup> attributed to [W(bpy)(CO)<sub>3</sub>(MeCN)] were observed.

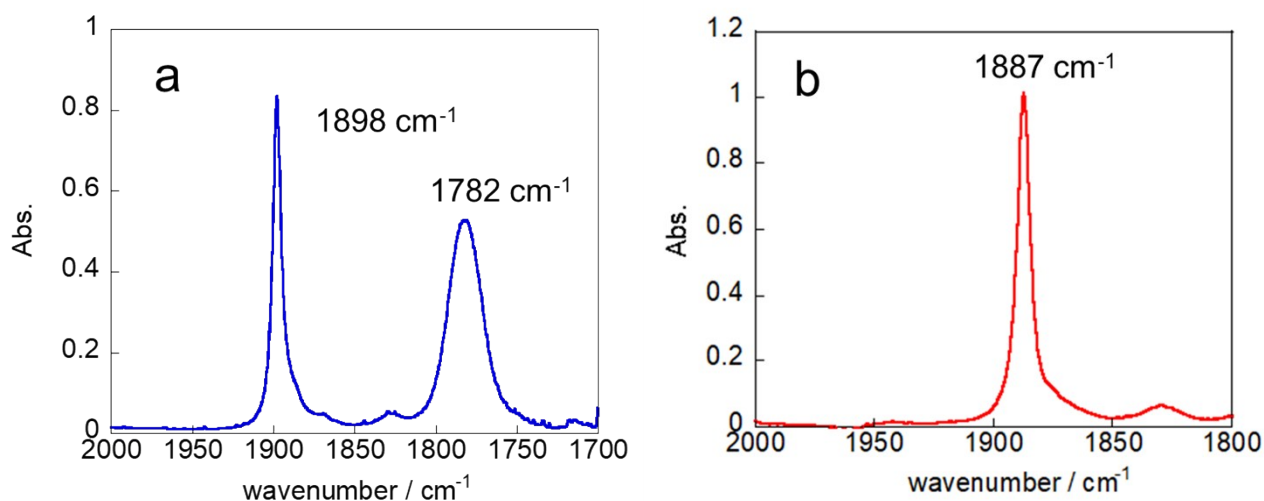

**Figure S9.** IR spectra of [W(bpy)(CO)<sub>3</sub>(MeCN)] in an acetonitrile solution (a) or a DMF solution (b). In DMF, peak shift occurred to lower wavenumber than in MeCN most likely because MeCN on W(0) complex substituted to DMF.

**Table S2.** Selected bond lengths in the geometrically optimized structures for *fac*-Mn(I)(bpy)(CO)<sub>3</sub>R and *fac*-Re(I)(bpy)(CO)<sub>3</sub>R calculated at the def2-SVP/PBE1PBE level with PCM solvent model for DMF.

|       | Mn(bpy)(CO) <sub>3</sub> R |                                                                                 |                                                                                    |                      |
|-------|----------------------------|---------------------------------------------------------------------------------|------------------------------------------------------------------------------------|----------------------|
|       | R                          |                                                                                 |                                                                                    |                      |
|       | dmf                        | OC <sub>2</sub> H <sub>4</sub> O(C <sub>2</sub> H <sub>5</sub> OH) <sub>2</sub> | OCOOC <sub>2</sub> H <sub>4</sub> O(C <sub>2</sub> H <sub>5</sub> OH) <sub>2</sub> | I (exp) <sup>a</sup> |
| Mn-N1 | 2.056                      | 2.055                                                                           | 2.058                                                                              | 2.03                 |
| Mn-N2 | 2.056                      | 2.059                                                                           | 2.056                                                                              | 2.05                 |
| Mn-Oa | 1.803                      | 1.791                                                                           | 1.787                                                                              | 1.80                 |

|        |       |       |       |       |
|--------|-------|-------|-------|-------|
| Mn-Oe  | 1.804 | 1.791 | 1.798 | 1.77  |
| Mn-Oe  | 1.807 | 1.795 | 1.806 | 1.80  |
| COa    | 1.142 | 1.151 | 1.149 | 1.15  |
| COe1   | 1.145 | 1.150 | 1.148 | 1.19  |
| COe    | 1.144 | 1.148 | 1.147 | 1.14  |
| M-O(R) | 2.075 | 2.020 | 2.045 | 2.724 |

| Re(bpy) (CO) <sub>3</sub> R |       |                                                                                 |                                                                                    |                                                       |
|-----------------------------|-------|---------------------------------------------------------------------------------|------------------------------------------------------------------------------------|-------------------------------------------------------|
|                             | R     |                                                                                 |                                                                                    |                                                       |
|                             | dmf   | OC <sub>2</sub> H <sub>4</sub> O(C <sub>2</sub> H <sub>5</sub> OH) <sub>2</sub> | OCOOC <sub>2</sub> H <sub>4</sub> O(C <sub>2</sub> H <sub>5</sub> OH) <sub>2</sub> | OCOOC <sub>5</sub> H <sub>11</sub> (exp) <sup>b</sup> |
| Re-N1                       | 2.167 | 2.155                                                                           | 2.201                                                                              | 2.178                                                 |
| Re-N2                       | 2.169 | 2.170                                                                           | 2.201                                                                              | 2.164                                                 |
| Re-Oa                       | 1.903 | 1.904                                                                           | 1.911                                                                              | 1.898                                                 |
| Re-Oe                       | 1.903 | 1.918                                                                           | 1.922                                                                              | 1.924                                                 |
| Re-Oe                       | 1.925 | 1.928                                                                           | 1.926                                                                              | 1.921                                                 |
| COa                         | 1.154 | 1.167                                                                           | 1.157                                                                              | 1.155                                                 |
| COe1                        | 1.155 | 1.169                                                                           | 1.156                                                                              | 1.149                                                 |
| COe                         | 1.159 | 1.168                                                                           | 1.154                                                                              | 1.146                                                 |
| M-O(R)                      | 2.247 | 2.175                                                                           | 2.165                                                                              | 2.142                                                 |

<sup>a</sup> G. J. Stor, D. J. Stufkens, P. Vernooijs, E. J. Baerends, J. Fraanje, and K. Goubitzs, *Inorg. Chem.*, 34 (1995) 1588-1594

<sup>b</sup> M. K. Mbagu, D. N. Kebulu, A. Winstead, S. K. Pramanik, H. N. Banerjee, M. O. Iwunze, J. M. Wachira, G. E. Greco, G. K. Haynes, A. Sehmer, F. H. Sarkar, D. M. Ho, R. D. Pike, S. K. Mandal, *Inorg. Chem. Commun.*, 21 (2012) 35–38.

**Table S3.** Calculated and observed  $\nu(\text{CO})$  vibrational wavenumbers of *fac*-Mn(bpy)(CO)<sub>3</sub>R

| R=NCCH <sub>3</sub> |      | R=dmf         |      | R=TEOA        |      | R=CO <sub>2</sub> -TEOA |      |
|---------------------|------|---------------|------|---------------|------|-------------------------|------|
| calcd               | obsd | calcd         | obsd | calcd         | obsd | calcd                   | obsd |
| 1989<br>(+44)       | 1945 | 1976<br>(+40) | 1936 | 1950<br>(+48) | 1902 | 1963<br>(+50)           | 1913 |
| 1998                |      | 1985<br>(+42) | 1943 | 1960<br>(+42) | 1918 | 1972<br>(+36)           | 1936 |
| 2077<br>(+31)       | 2046 | 2071<br>(+32) | 2039 | 2050<br>(+33) | 2017 | 2061<br>(+33)           | 2028 |

Values in parentheses denote the difference in frequency between the calculated and experimental.

**Table S4.** Calculated  $\nu(\text{CO})$  vibrational wavenumbers of *fac*-Mn(bpy)(CO)<sub>3</sub> TEOA(NH<sup>+</sup>)

| R=TEOA(NH <sup>+</sup> ) |  |
|--------------------------|--|
| calcd                    |  |
| 1961<br>(+59)            |  |
| 1966<br>(+48)            |  |
| 2057<br>(+40)            |  |

Values in parentheses denote the difference in frequency between the calculated and the observed species (1902, 1918, and 2017 cm<sup>-1</sup>).

**Table S5.** Calculated and observed  $\nu(\text{CO})$  vibrational wavenumbers of *fac*-Re(bpy)(CO)<sub>3</sub>R

| R=NCCH <sub>3</sub> |      | R=dmf         |      | R=TEOA        |      | R=CO <sub>2</sub> -TEOA |      |
|---------------------|------|---------------|------|---------------|------|-------------------------|------|
| calcd               | obsd | calcd         | obsd | calcd         | obsd | calcd                   | obsd |
| 1948                |      | 1934<br>(+21) | 1913 | 1902<br>(+21) | 1881 | 1915<br>(+23)           | 1892 |
| 1956<br>(+21)       | 1935 | 1938<br>(+16) | 1922 | 1913<br>(+16) | 1897 | 1928<br>(+13)           | 1915 |
| 2053<br>(+16)       | 2037 | 2047<br>(+18) | 2029 | 2025<br>(+19) | 2006 | 2038<br>(+18)           | 2020 |

Values in parentheses denote the difference in frequency between the calculated and experimental.

**Figure S10.** Molecular structures of *fac*-Mn(bpy)(CO)<sub>3</sub>-TEOA(left) and *fac*-Mn(bpy)(CO)<sub>3</sub>-CO<sub>2</sub>-TEOA(right). The values in figures denote the length of hydrogen bonding.

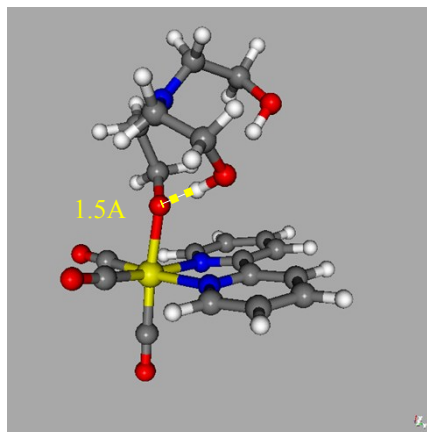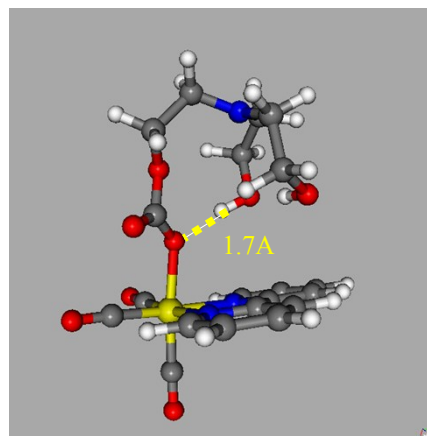

Supplement: SC-010-C8SC04389B-s001.pdf [file SC-010-C8SC04389B-s001.pdf]
